# Supplementary material for: Key challenges facing the application of the conductivity mass balance method: a case study of the Mississippi River basin
Source: Copernicus journal article supplement (doi:10.5194/hess-24-6075-2020), 2020-12-23
Supplement: Supplementary file 1 [file hess-24-6075-2020-supplement.zip]

Archive with 4 entries (3 files):
- Supplement/
- Supplement/Supplement 1.xlsx
- Supplement/Supplement 2.xlsx
- hess-24-6075-2020-supplement-title-page.pdf
