# Supplementary material for: Key challenges facing the application of the conductivity mass balance method: a case study of the Mississippi River basin
Source: Copernicus journal article supplement (doi:10.5194/hess-24-6075-2020), 2020-12-23
Supplement: Supplementary file 1 [file hess-24-6075-2020-supplement.zip › hess-24-6075-2020-supplement-title-page.pdf]

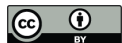

## *Supplement of*

# **Key challenges facing the application of the conductivity mass balance method: a case study of the Mississippi River basin**

**Hang Lyu et al.**

*Correspondence to:* Hang Lyu (lvhangmail@163.com)

- [hess-24-6075-2020-supplement-title-page.pdf](#)
- Supplement
  - Supplement 1.xlsx
  - Supplement 2.xlsx

The copyright of individual parts of the supplement might differ from the CC BY 4.0 License.
