# Supplementary material for: Key challenges facing the application of the conductivity mass balance method: a case study of the Mississippi River basin
Source: Copernicus journal article supplement (doi:10.5194/hess-24-6075-2020), 2020-12-23
Supplement: Supplementary file 1 [file hess-24-6075-2020-supplement.zip › Supplement/Supplement 2.xlsx]

## Sheet: sheet
Site number	Sampling durations	SCRO (μs/cm)	SCBF (μs/cm)	BFI	S(SCBF)	S(SCRO)	WSCBF	WSCRO	WBFI-Genereux
03007800	12 months	55	141.065	0.182149	-1.61869	-2.87729	24.5428	6.11131	0.146813
	9 months	53	144.456	0.191774	-1.53941	-2.45704	39.6487	5.32496	0.210752
	6 months	54	139.724	0.193777	-1.5639	-2.64639	47.173	5.2994	0.250387
	3 months	56	135.11	0.206185	-1.53393	-2.79742	65.3674	9.45322	0.331878
03036000	12 months	152	442.794	0.283409	-1.46676	-1.34085	157.704	23.4944	0.270744
	9 months	150	428.809	0.297385	-1.4538	-1.30056	171.34	24.2088	0.313005
	6 months	146	417.8	0.322529	-1.44344	-1.16105	162.781	22.676	0.325017
	3 months	149	386.182	0.390978	-1.51092	-1.02381	195.579	25.0727	0.48605
03073000	12 months	207.42	1762.14	0.14683	-0.752058	-0.8201	1920.89	32.9568	0.373109
	9 months	198	1362.51	0.146882	-0.70366	-1.05534	1635.61	29.7948	0.475492
	6 months	201	1622.58	0.176589	-0.601913	-0.726116	2154.83	32.647	0.548103
	3 months	211	1326.22	0.208943	-0.683856	-0.796715	1832.47	27.605	0.681723
06037500	12 months	165.47	532.233	0.657051	-1.44562	-0.237208	71.0055	62.7601	0.160721
	9 months	293	533.114	0.704702	-2.21641	-0.513444	73.4224	32.3307	0.252404
	6 months	277	510.576	0.753799	-2.17129	-0.395269	95.3292	24.2226	0.340646
	3 months	264	479.553	0.76967	-2.19903	-0.380681	113.089	19.0437	0.444624
06089000	12 months	302	1260	0.326142	-1.26881	-0.730355	584.365	31.411	0.341944
	9 months	297	1203.3	0.320383	-1.24483	-0.715611	579.087	30.8181	0.325145
	6 months	297	1132.25	0.357302	-1.27024	-0.661994	555.636	24.0672	0.366462
	3 months	294	1093.03	0.354403	-1.28539	-0.692479	492.189	23.5977	0.340765
	12 months	302	1144.47	0.344557	-1.2643	-0.706761	554.866	31.411	0.354216
	9 months	294	1197.19	0.308362	-1.21995	-0.756034	686.604	30.8533	0.402903
	6 months	297	1125.73	0.368953	-0.781288	-0.765214	656.423	37.8343	0.459094
	3 months	286	1057.2	0.320758	-1.28884	-0.807507	725.626	39.5251	0.584308
06340500	12 months	400.91	2216.68	0.211651	-1.21311	-0.823791	324.241	107.325	0.119655
	9 months	358	2233.27	0.204996	-1.18338	-0.741569	348.321	86.7513	0.127262
	6 months	336	2029.85	0.155727	-1.17848	-1.07872	718.398	78.7594	0.299872
	3 months	763	2020.87	0.481985	-1.52495	-0.682747	778.89	230.876	0.446279
06711565	24 months	271.34	1502.38	0.195984	-1.12998	-0.920578	815.278	30.0245	0.271681
	21 months	269	1515.82	0.196743	-1.12923	-0.896207	831.235	29.6088	0.28
	18 months	266	1535.95	0.201948	-1.12659	-0.842079	842.108	29.3192	0.283509
	15 months	262	1522.81	0.185725	-1.10908	-0.92806	878.282	29.3832	0.292149
	12 months	271.34	1475.47	0.20434	-1.11247	-0.898194	770.761	30.0245	0.268339
	9 months	270	1529.5	0.215351	-1.10108	-0.801077	823.376	32.1762	0.294206
	6 months	277	1262.56	0.245352	-1.04543	-0.91617	922.815	15.7718	0.451287
	3 months	267	1204.36	0.273272	-0.943675	-0.833139	975.582	11.8276	0.534444
07086000	24 months	71	208.71	0.262203	-1.54847	-1.49521	36.5113	3.92569	0.149368
	21 months	71	209.63	0.266065	-1.55938	-1.50216	38.5811	3.92569	0.163803
	18 months	72	210	0.281098	-1.56588	-1.428	40.1647	4.83021	0.169453
	15 months	71	210	0.294944	-1.55639	-1.29459	42.7608	4.08271	0.18042
	12 months	71	199.554	0.272196	-1.56408	-1.47256	31.999	3.92569	0.142853
	9 months	70	193.567	0.303219	-1.54512	-1.3095	47.58	3.27753	0.218888
	6 months	84	194.431	0.445299	-1.76859	-0.944113	48.3155	5.96524	0.265322
	3 months	83	194.431	0.545943	-1.70384	-0.637003	48.3155	7.2399	0.31367
07097000	24 months	156.93	616.042	0.36607	-1.34987	-0.589868	52.2877	16.7051	0.0834804
	21 months	154.366	607.692	0.345031	-1.38242	-0.635762	87.5454	16.5927	0.11638
	18 months	173	610.235	0.373924	-1.45193	-0.646533	87.3544	20.0205	0.12438
	15 months	170	591.43	0.348246	-1.54435	-0.714437	117.581	18.7361	0.158262
	12 months	157	593.074	0.394371	-1.33669	-0.558679	108.923	16.8237	0.162638
	9 months	153	580.684	0.300999	-1.06834	-0.907024	121.36	16.6513	0.17061
	6 months	165	589.782	0.18966	0.706107	-2.24561	132.18	14.1739	0.204614
	3 months	150	513.282	0.123558	2.17766	-3.97815	198.367	7.60482	0.384136
07119700	24 months	464.86	1641.9	0.332583	-1.38913	-0.794198	322.592	48.0088	0.15669
	21 months	457	1625.75	0.324158	-1.40798	-0.810469	316.809	42.2258	0.154069
	18 months	446.82	1606.6	0.299151	-1.43758	-0.888041	370.487	36.6373	0.166078
	15 months	434.55	1622.15	0.2938	1.69983	-1.70078	366.883	30.9643	0.161326
	12 months	470.16	1612.18	0.349209	-1.35594	-0.783498	285.553	50.8742	0.138398
	9 months	450	1570.59	0.341617	-1.35319	-0.787802	275.763	39.9052	0.144179
	6 months	494	1414.93	0.356696	-0.944419	-1.17411	526.922	56.885	0.317504
	3 months	476	1236.83	0.40902	-1.22222	-1.05921	687.768	60.6048	0.508285
03067510	12 months	23	68.6033	0.218618	-1.45903	-1.81783	17.9431	4.56153	0.18316
	9 months	23	59.9311	0.259811	-1.51567	-1.81538	25.1626	4.59497	0.308269
	6 months	24	55.1311	0.288693	-1.62436	-1.9633	27.265	2.74825	0.430138
	3 months	26	54.4567	0.332208	-1.69921	-1.93902	29.5329	2.48414	0.533093
03199700	12 months	121.9	655.212	0.176176	-1.17853	-1.07814	366.027	16.6942	0.266442
	9 months	118.17	614.623	0.17206	-1.21846	-1.14914	320.86	15.6817	0.227067
	6 months	115	492.802	0.243187	-1.142	-0.985185	404.431	18.587	0.468046
	3 months	136.04	486.996	0.255217	-1.14443	-1.19912	419.275	43.221	0.595328
06228000	12 months	159	620.4	0.312361	-1.30059	-0.769899	198.735	5.72344	0.231848
	9 months	160	635.632	0.346992	-1.29209	-0.644218	198.377	5.88931	0.238987
	6 months	297	636.086	0.444853	-1.76377	-1.14539	234.507	44.2086	0.350464
	3 months	308.57	607.003	0.463961	-1.86579	-1.28009	229.452	65.5917	0.416517
06296120	12 months	270	909.276	0.455406	-1.40447	-0.510378	263.989	24.3203	0.2561
	9 months	276	919.994	0.504986	-1.4129	-0.424816	259.646	29.1374	0.270517
	6 months	575	908.501	0.49107	-2.68375	-1.8124	255.434	37.0388	0.416095
	3 months	567.7	818.144	0.549467	-3.11752	-1.96221	205.461	33.8076	0.490894
06892350	12 months	293.685	1104.07	0.354002	-1.38718	-0.654733	536.107	78.9366	0.374839
	9 months	287.755	1110.24	0.391543	-1.39207	-0.532739	533.623	82.476	0.392636
	6 months	270.94	1099.14	0.373197	-1.39688	-0.532264	544.112	79.298	0.385503
	3 months	221.65	891.587	0.428869	-1.39884	-0.423698	441.19	50.0417	0.408464
07075250	12 months	17	40.8169	0.178053	-1.30204	-3.46651	33.6355	3.11158	0.641277
	9 months	17.85	41.1566	0.169572	-1.33868	-3.93594	35.4161	4.41365	0.779327
	6 months	20	41.6861	0.163685	-1.35587	-4.98378	37.9864	1.75934	1.03699
	3 months	21	41.7725	0.212941	-1.21284	-4.13785	40.2393	0	1.01548
07075270	12 months	18.368	52.9638	0.102853	-1.35667	-4.69154	25.9571	1.29233	0.30127
	9 months	18	49.4087	0.117852	-1.43515	-4.33994	24.4833	0.901327	0.348906
	6 months	19	49.5	0.131494	-1.53432	-4.14855	24.6064	2.09887	0.455979
	3 months	23.35	49.5225	0.124674	-1.83232	-6.29198	24.6533	1.75934	0.673293
07079300	12 months	105.964	404.925	0.234457	-1.33928	-1.16128	96.2783	27.5419	0.193716
	9 months	97.28	378.979	0.232723	-1.32799	-1.143	69.634	23.1148	0.143349
	6 months	87.321	301.995	0.284082	-1.41754	-1.02197	57.4294	21.3221	0.156017
	3 months	79.628	307.09	0.298388	-1.29069	-1.07165	149.679	16.9516	0.371817
07081200	12 months	71	268.948	0.260042	-1.34467	-1.02433	45.8139	7.14248	0.152867
	9 months	71	264.208	0.233369	-1.35675	-1.21007	53.0164	6.25132	0.16858
	6 months	69.03	226.007	0.24985	-1.42665	-1.3243	56.9484	6.32765	0.206348
	3 months	68	181.845	0.24474	-1.54512	-1.86277	73.307	7.85297	0.270512
03044000	12 months	202.9	915.4	0.264515	-1.27486	-0.794004	132.845	27.9333	0.0921702
	9 months	219.44	912.193	0.235839	-1.3067	-1.0288	147.439	34.4362	0.100028
	6 months	185.95	872.167	0.281187	-0.79239	-0.794753	213.121	32.5796	0.139175
	3 months	215.75	746.843	0.294524	-1.10523	-1.06002	604.091	36.6702	0.581979
03072655	12 months	138	494.056	0.209462	-1.37655	-1.46586	70.2217	12.1157	0.0857773
	9 months	136	440.784	0.220844	-1.51753	-1.55229	185.194	7.47402	0.215282
	6 months	137.12	471.12	0.196637	-1.49473	-1.65276	195.784	8.10738	0.21952
	3 months	137.24	419.016	0.300936	-1.2591	-1.20607	266.587	7.24008	0.437781
03106000	12 months	244	1007.76	0.211498	-1.32566	-1.19215	269.849	31.7889	0.133174
	9 months	243	922.754	0.264813	-1.21827	-1.02912	380.917	34.5093	0.237988
	6 months	243	862.225	0.265751	-1.35133	-1.10142	526.978	34.966	0.343599
	3 months	251	1026.3	0.290735	-0.836347	-1.32731	367.535	45.746	0.371471
03201980	12 months	264.5	1011.96	0.219334	-1.32792	-1.26628	270.696	42.4285	0.154375
	9 months	253.12	964.411	0.241513	-1.28038	-1.13741	298.409	42.143	0.178829
	6 months	255.25	1023.6	0.252429	-1.25124	-1.06614	368.823	52.3985	0.222396
	3 months	263.2	924.951	0.300192	-0.620902	-1.14825	599.865	32.0865	0.509492
03238745	12 months	238.23	1664.28	0.160573	-0.854312	-0.918087	1872.32	51.6219	0.579642
	9 months	251.79	1574.87	0.157278	-0.902556	-1.0657	1886.28	58.4335	0.65334
	6 months	232	1208.45	0.215701	-0.838559	-0.940516	1152.44	53.3025	0.58046
	3 months	242.36	1214.07	0.236065	-0.920203	-0.872861	1320.83	69.6582	0.675932
03321500	12 months	194.5	487.008	0.297383	-1.64624	-1.5785	86.9566	14.8096	0.132519
	9 months	188.3	477.64	0.310362	-1.61106	-1.46175	144.258	12.2711	0.243308
	6 months	190.44	435.424	0.355392	-1.72252	-1.43395	113.863	15.424	0.250008
	3 months	192.14	413.266	0.419619	-1.45186	-1.39571	216.033	6.91329	0.553056
03374100	12 months	258.65	779.943	0.302069	-1.48282	-1.15083	97.5941	36.2852	0.109662
	9 months	250.16	734.429	0.31788	-1.40614	-1.1461	200.741	37.6271	0.219968
	6 months	250.31	730.313	0.358833	-1.40575	-0.971442	219.82	32.0523	0.263283
	3 months	276.8	751.397	0.442298	-1.47927	-0.773704	213.056	72.047	0.283803
