# Supplementary material for: Key challenges facing the application of the conductivity mass balance method: a case study of the Mississippi River basin
Source: Copernicus journal article supplement (doi:10.5194/hess-24-6075-2020), 2020-12-23
Supplement: Supplementary file 1 [file Supplement 1.xlsx]

## Sheet: BFI
		Sampling durations	24 months	21 months	18 months	15 months	12 months	9 months	6 months	3 months					Sampling durations	12 months	9 months	6 months	3 months
Site number													Site number
06711565		Mean	0.208567	0.214656	0.213257	0.215702	0.222753	0.212859	0.252521	0.332731			03044000		Mean	0.285588	0.274968	0.313559	0.347434
		Standard deviation	0.0689126	0.0611548	0.0695054	0.065012	0.0985722	0.0833365	0.0903972	0.115928					Standard deviation	0.0529794	0.0552179	0.081583	0.105697
		Upper limit	0.277479	0.27581	0.282762	0.280714	0.321325	0.296196	0.342918	0.44866					Upper limit	0.338568	0.330186	0.395142	0.453132
		Lower limit	0.139654	0.153501	0.143752	0.15069	0.124181	0.129523	0.162124	0.216803					Lower limit	0.232609	0.21975	0.231976	0.241737
		Normal distribution	0.188	0.865	0.41	0.234	0.083	0.332	0.54	0.869					Normal distribution	0.429	0.213	0.402	0.163
		T-test		0.769	0.831	0.738	0.601	0.86	0.092	0					T-test		0.635	0.33	0.089
07086000		Mean	0.280404	0.276167	0.304207	0.274667	0.268103	0.309253	0.303725	0.368011			03067510		Mean	0.269173	0.296015	0.309795	0.300533
		Standard deviation	0.0545703	0.0536288	0.0604994	0.053693	0.0529668	0.123051	0.143363	0.130076					Standard deviation	0.0592401	0.0708064	0.0736924	0.0706939
		Upper limit	0.334974	0.329796	0.364706	0.32836	0.32107	0.432305	0.447088	0.498087					Upper limit	0.328413	0.366821	0.383488	0.371227
		Lower limit	0.225834	0.222538	0.243707	0.220974	0.215136	0.186202	0.160362	0.237935					Lower limit	0.209933	0.225208	0.236103	0.229839
		Normal distribution	0.081	0.847	0.46	0.084	0.396	0.121	0.265	0.537					Normal distribution	0.083	0.249	0.296	0.639
		T-test		0.843	0.303	0.789	0.565	0.447	0.591	0.04					T-test		0.239	0.086	0.171
06089000		Mean	0.3469	0.32602	0.374127	0.386843	0.364906	0.344398	0.345179	0.412831			03072655		Mean	0.241044	0.256406	0.255928	0.275164
		Standard deviation	0.0789698	0.0767772	0.0793889	0.116861	0.102178	0.133682	0.0940552	0.133031					Standard deviation	0.0358187	0.0459806	0.0558501	0.0591641
		Upper limit	0.42587	0.402797	0.453516	0.503704	0.467084	0.47808	0.439234	0.545862					Upper limit	0.276863	0.302387	0.311778	0.334329
		Lower limit	0.26793	0.249243	0.294738	0.269982	0.262728	0.210716	0.251123	0.2798					Lower limit	0.205225	0.210426	0.200078	0.216
		Normal distribution	0.497	0.359	0.719	0.077	0.485	0.467	0.901	0.834					Normal distribution	0.621	0.578	0.104	0.951
		T-test		0.303	0.188	0.126	0.448	0.93	0.939	0.024					T-test		0.441	0.511	0.158
07097000		Mean	0.397979	0.378522	0.423273	0.409331	0.389188	0.350243	0.369672	0.388371			03199700		Mean	0.206481	0.208778	0.258555	0.267983
		Standard deviation	0.042283	0.0415075	0.0634292	0.0710515	0.0687089	0.0751345	0.0918228	0.138112					Standard deviation	0.0384687	0.0379757	0.0904111	0.0718905
		Upper limit	0.440262	0.420029	0.486702	0.480383	0.457897	0.425378	0.461495	0.526483					Upper limit	0.24495	0.246753	0.348966	0.339873
		Lower limit	0.355696	0.337014	0.359844	0.33828	0.320479	0.275109	0.277849	0.250259					Lower limit	0.168013	0.170802	0.168144	0.196092
		Normal distribution	0.526	0.682	0.173	0.211	0.096	0.331	0.95	0.334					Normal distribution	0.95	0.436	0.649	0.943
		T-test		0.122	0.119	0.514	0.604	0.012	0.189	0.752					T-test		0.889	0.094	0.021
													06037500		Mean	0.632433	0.607444	0.571111	0.613587
															Standard deviation	0.054754	0.0808148	0.075281	0.0513117
															Upper limit	0.687187	0.688259	0.646392	0.664899
															Lower limit	0.577679	0.526629	0.49583	0.562275
															Normal distribution	0.555	0.134	0.706	0.988
															T-test		0.385	0.033	0.394
													06228000		Mean	0.32259	0.324494	0.316856	0.294236
															Standard deviation	0.0919548	0.085288	0.105517	0.123323
															Upper limit	0.414545	0.409782	0.422373	0.417559
															Lower limit	0.230635	0.239206	0.21134	0.170913
															Normal distribution	0.642	0.333	0.395	0.088
															T-test		0.946	0.856	0.415
													06296120		Mean	0.453236	0.454052	0.430374	0.456133
															Standard deviation	0.0221482	0.0507901	0.092487	0.128519
															Upper limit	0.475384	0.504843	0.522861	0.584652
															Lower limit	0.431087	0.403262	0.337887	0.327614
															Normal distribution	0.605	0.869	0.832	0.652
															T-test		0.962	0.442	0.943
													06340500		Mean	0.30431	0.360897	0.386672	0.537121
															Standard deviation	0.0906732	0.132622	0.207219	0.0933714
															Upper limit	0.394983	0.493519	0.593891	0.630493
															Lower limit	0.213637	0.228276	0.179453	0.44375
															Normal distribution	0.06	0.415	0.561	0.187
															T-test		0.235	0.226	0
													06892350		Mean	0.421457	0.424988	0.422319	0.457413
															Standard deviation	0.0676166	0.0791739	0.0883909	0.112927
															Upper limit	0.489073	0.504162	0.51071	0.57034
															Lower limit	0.35384	0.345814	0.333928	0.344486
															Normal distribution	0.74	0.915	0.951	0.563
															T-test		0.512	0.957	0.164
													07075250		Mean	0.173304	0.16831	0.244336	0.276076
															Standard deviation	0.0710358	0.0757358	0.135216	0.111831
															Upper limit	0.24434	0.244046	0.379552	0.387906
															Lower limit	0.102268	0.0925742	0.10912	0.164245
															Normal distribution	0.905	0.429	0.118	0.861
															T-test		0.869	0.121	0.013
													07081200		Mean	0.273636	0.233751	0.413266	0.397621
															Standard deviation	0.0591782	0.0584094	0.191341	0.150172
															Upper limit	0.332814	0.29216	0.604607	0.547793
															Lower limit	0.214457	0.175342	0.221926	0.24745
															Normal distribution	0.877	0.551	0.061	0.156
															T-test		0.127	0.039	0.024
													03007800		Mean	0.21645	0.221208	0.231234	0.221588
															Standard deviation	0.0581142	0.0385858	0.0379225	0.0631314
															Upper limit	0.274565	0.259794	0.269157	0.28472
															Lower limit	0.158336	0.182623	0.193312	0.158457
															Normal distribution	0.306	0.245	0.628	0.3
															T-test		0.85	0.556	0.868
													03106000		Mean	0.244039	0.255459	0.272807	0.29242
															Standard deviation	0.0486676	0.0426306	0.0595984	0.0626768
															Upper limit	0.292707	0.29809	0.332405	0.355097
															Lower limit	0.195372	0.212828	0.213209	0.229744
															Normal distribution	0.773	0.424	0.465	0.472
															T-test		0.5	0.159	0.025
													03201980		Mean	0.263601	0.26738	0.259964	0.299173
															Standard deviation	0.0340398	0.0409377	0.0631238	0.0731117
															Upper limit	0.297641	0.308318	0.323088	0.372284
															Lower limit	0.229561	0.226443	0.196841	0.226061
															Normal distribution	0.483	0.983	0.072	0.489
															T-test		0.8	0.856	0.13
													03321500		Mean	0.3169	0.298562	0.352588	0.402347
															Standard deviation	0.0429398	0.050348	0.0833177	0.1076
															Upper limit	0.35984	0.34891	0.435906	0.509947
															Lower limit	0.27396	0.248214	0.269271	0.294747
															Normal distribution	0.902	0.832	0.249	0.071
															T-test		0.392	0.249	0.038
													03374100		Mean	0.337977	0.347002	0.391191	0.403607
															Standard deviation	0.0577402	0.0718111	0.0983931	0.0707142
															Upper limit	0.395717	0.418813	0.489584	0.474321
															Lower limit	0.280237	0.275191	0.292797	0.332893
															Normal distribution	0.989	0.743	0.173	0.382
															T-test		0.717	0.093	0.012

## Sheet: SCBF
		Sampling durations	24 months	21 months	18 months	15 months	12 months	9 months	6 months	3 months					Sampling durations	12 months	9 months	6 months	3 months
Site number													Site number
06711565		Mean	0.208567	0.214656	0.213257	0.215702	0.222753	0.212859	0.252521	0.332731			03044000		Mean	0.285588	0.274968	0.313559	0.347434
		Standard deviation	0.0689126	0.0611548	0.0695054	0.065012	0.0985722	0.0833365	0.0903972	0.115928					Standard deviation	0.0529794	0.0552179	0.081583	0.105697
		Upper limit	0.277479	0.27581	0.282762	0.280714	0.321325	0.296196	0.342918	0.44866					Upper limit	0.338568	0.330186	0.395142	0.453132
		Lower limit	0.139654	0.153501	0.143752	0.15069	0.124181	0.129523	0.162124	0.216803					Lower limit	0.232609	0.21975	0.231976	0.241737
		Normal distribution	0.188	0.865	0.41	0.234	0.083	0.332	0.54	0.869					Normal distribution	0.429	0.213	0.402	0.163
		T-test		0.769	0.831	0.738	0.601	0.86	0.092	0					T-test		0.635	0.33	0.089
07086000		Mean	0.280404	0.276167	0.304207	0.274667	0.268103	0.309253	0.303725	0.368011			03067510		Mean	0.269173	0.296015	0.309795	0.300533
		Standard deviation	0.0545703	0.0536288	0.0604994	0.053693	0.0529668	0.123051	0.143363	0.130076					Standard deviation	0.0592401	0.0708064	0.0736924	0.0706939
		Upper limit	0.334974	0.329796	0.364706	0.32836	0.32107	0.432305	0.447088	0.498087					Upper limit	0.328413	0.366821	0.383488	0.371227
		Lower limit	0.225834	0.222538	0.243707	0.220974	0.215136	0.186202	0.160362	0.237935					Lower limit	0.209933	0.225208	0.236103	0.229839
		Normal distribution	0.081	0.847	0.46	0.084	0.396	0.121	0.265	0.537					Normal distribution	0.083	0.249	0.296	0.639
		T-test		0.843	0.303	0.789	0.565	0.447	0.591	0.04					T-test		0.239	0.086	0.171
06089000		Mean	0.3469	0.32602	0.374127	0.386843	0.364906	0.344398	0.345179	0.412831			03072655		Mean	0.241044	0.256406	0.255928	0.275164
		Standard deviation	0.0789698	0.0767772	0.0793889	0.116861	0.102178	0.133682	0.0940552	0.133031					Standard deviation	0.0358187	0.0459806	0.0558501	0.0591641
		Upper limit	0.42587	0.402797	0.453516	0.503704	0.467084	0.47808	0.439234	0.545862					Upper limit	0.276863	0.302387	0.311778	0.334329
		Lower limit	0.26793	0.249243	0.294738	0.269982	0.262728	0.210716	0.251123	0.2798					Lower limit	0.205225	0.210426	0.200078	0.216
		Normal distribution	0.497	0.359	0.719	0.077	0.485	0.467	0.901	0.834					Normal distribution	0.621	0.578	0.104	0.951
		T-test		0.303	0.188	0.126	0.448	0.93	0.939	0.024					T-test		0.441	0.511	0.158
07097000		Mean	0.397979	0.378522	0.423273	0.409331	0.389188	0.350243	0.369672	0.388371			03199700		Mean	0.206481	0.208778	0.258555	0.267983
		Standard deviation	0.042283	0.0415075	0.0634292	0.0710515	0.0687089	0.0751345	0.0918228	0.138112					Standard deviation	0.0384687	0.0379757	0.0904111	0.0718905
		Upper limit	0.440262	0.420029	0.486702	0.480383	0.457897	0.425378	0.461495	0.526483					Upper limit	0.24495	0.246753	0.348966	0.339873
		Lower limit	0.355696	0.337014	0.359844	0.33828	0.320479	0.275109	0.277849	0.250259					Lower limit	0.168013	0.170802	0.168144	0.196092
		Normal distribution	0.526	0.682	0.173	0.211	0.096	0.331	0.95	0.334					Normal distribution	0.95	0.436	0.649	0.943
		T-test		0.122	0.119	0.514	0.604	0.012	0.189	0.752					T-test		0.889	0.094	0.021
													06037500		Mean	0.632433	0.607444	0.571111	0.613587
															Standard deviation	0.054754	0.0808148	0.075281	0.0513117
															Upper limit	0.687187	0.688259	0.646392	0.664899
															Lower limit	0.577679	0.526629	0.49583	0.562275
															Normal distribution	0.555	0.134	0.706	0.988
															T-test		0.385	0.033	0.394
													06228000		Mean	0.32259	0.324494	0.316856	0.294236
															Standard deviation	0.0919548	0.085288	0.105517	0.123323
															Upper limit	0.414545	0.409782	0.422373	0.417559
															Lower limit	0.230635	0.239206	0.21134	0.170913
															Normal distribution	0.642	0.333	0.395	0.088
															T-test		0.946	0.856	0.415
													06296120		Mean	0.453236	0.454052	0.430374	0.456133
															Standard deviation	0.0221482	0.0507901	0.092487	0.128519
															Upper limit	0.475384	0.504843	0.522861	0.584652
															Lower limit	0.431087	0.403262	0.337887	0.327614
															Normal distribution	0.605	0.869	0.832	0.652
															T-test		0.962	0.442	0.943
													06340500		Mean	0.30431	0.360897	0.386672	0.537121
															Standard deviation	0.0906732	0.132622	0.207219	0.0933714
															Upper limit	0.394983	0.493519	0.593891	0.630493
															Lower limit	0.213637	0.228276	0.179453	0.44375
															Normal distribution	0.06	0.415	0.561	0.187
															T-test		0.235	0.226	0
													06892350		Mean	0.421457	0.424988	0.422319	0.457413
															Standard deviation	0.0676166	0.0791739	0.0883909	0.112927
															Upper limit	0.489073	0.504162	0.51071	0.57034
															Lower limit	0.35384	0.345814	0.333928	0.344486
															Normal distribution	0.74	0.915	0.951	0.563
															T-test		0.512	0.957	0.164
													07075250		Mean	0.173304	0.16831	0.244336	0.276076
															Standard deviation	0.0710358	0.0757358	0.135216	0.111831
															Upper limit	0.24434	0.244046	0.379552	0.387906
															Lower limit	0.102268	0.0925742	0.10912	0.164245
															Normal distribution	0.905	0.429	0.118	0.861
															T-test		0.869	0.121	0.013
													07081200		Mean	0.273636	0.233751	0.413266	0.397621
															Standard deviation	0.0591782	0.0584094	0.191341	0.150172
															Upper limit	0.332814	0.29216	0.604607	0.547793
															Lower limit	0.214457	0.175342	0.221926	0.24745
															Normal distribution	0.877	0.551	0.061	0.156
															T-test		0.127	0.039	0.024
													03007800		Mean	0.21645	0.221208	0.231234	0.221588
															Standard deviation	0.0581142	0.0385858	0.0379225	0.0631314
															Upper limit	0.274565	0.259794	0.269157	0.28472
															Lower limit	0.158336	0.182623	0.193312	0.158457
															Normal distribution	0.306	0.245	0.628	0.3
															T-test		0.85	0.556	0.868
													03106000		Mean	0.244039	0.255459	0.272807	0.29242
															Standard deviation	0.0486676	0.0426306	0.0595984	0.0626768
															Upper limit	0.292707	0.29809	0.332405	0.355097
															Lower limit	0.195372	0.212828	0.213209	0.229744
															Normal distribution	0.773	0.424	0.465	0.472
															T-test		0.5	0.159	0.025
													03201980		Mean	0.263601	0.26738	0.259964	0.299173
															Standard deviation	0.0340398	0.0409377	0.0631238	0.0731117
															Upper limit	0.297641	0.308318	0.323088	0.372284
															Lower limit	0.229561	0.226443	0.196841	0.226061
															Normal distribution	0.483	0.983	0.072	0.489
															T-test		0.8	0.856	0.13
													03321500		Mean	0.3169	0.298562	0.352588	0.402347
															Standard deviation	0.0429398	0.050348	0.0833177	0.1076
															Upper limit	0.35984	0.34891	0.435906	0.509947
															Lower limit	0.27396	0.248214	0.269271	0.294747
															Normal distribution	0.902	0.832	0.249	0.071
															T-test		0.392	0.249	0.038
													03374100		Mean	0.337977	0.347002	0.391191	0.403607
															Standard deviation	0.0577402	0.0718111	0.0983931	0.0707142
															Upper limit	0.395717	0.418813	0.489584	0.474321
															Lower limit	0.280237	0.275191	0.292797	0.332893
															Normal distribution	0.989	0.743	0.173	0.382
															T-test		0.717	0.093	0.012

## Sheet: SCRO
		Sampling durations	24 months	21 months	18 months	15 months	12 months	9 months	6 months	3 months					Sampling durations	12 months	9 months	6 months	3 months
Site number													Site number
06711565		Mean	0.208567	0.214656	0.213257	0.215702	0.222753	0.212859	0.252521	0.332731			03044000		Mean	0.285588	0.274968	0.313559	0.347434
		Standard deviation	0.0689126	0.0611548	0.0695054	0.065012	0.0985722	0.0833365	0.0903972	0.115928					Standard deviation	0.0529794	0.0552179	0.081583	0.105697
		Upper limit	0.277479	0.27581	0.282762	0.280714	0.321325	0.296196	0.342918	0.44866					Upper limit	0.338568	0.330186	0.395142	0.453132
		Lower limit	0.139654	0.153501	0.143752	0.15069	0.124181	0.129523	0.162124	0.216803					Lower limit	0.232609	0.21975	0.231976	0.241737
		Normal distribution	0.188	0.865	0.41	0.234	0.083	0.332	0.54	0.869					Normal distribution	0.429	0.213	0.402	0.163
		T-test		0.769	0.831	0.738	0.601	0.86	0.092	0					T-test		0.635	0.33	0.089
07086000		Mean	0.280404	0.276167	0.304207	0.274667	0.268103	0.309253	0.303725	0.368011			03067510		Mean	0.269173	0.296015	0.309795	0.300533
		Standard deviation	0.0545703	0.0536288	0.0604994	0.053693	0.0529668	0.123051	0.143363	0.130076					Standard deviation	0.0592401	0.0708064	0.0736924	0.0706939
		Upper limit	0.334974	0.329796	0.364706	0.32836	0.32107	0.432305	0.447088	0.498087					Upper limit	0.328413	0.366821	0.383488	0.371227
		Lower limit	0.225834	0.222538	0.243707	0.220974	0.215136	0.186202	0.160362	0.237935					Lower limit	0.209933	0.225208	0.236103	0.229839
		Normal distribution	0.081	0.847	0.46	0.084	0.396	0.121	0.265	0.537					Normal distribution	0.083	0.249	0.296	0.639
		T-test		0.843	0.303	0.789	0.565	0.447	0.591	0.04					T-test		0.239	0.086	0.171
06089000		Mean	0.3469	0.32602	0.374127	0.386843	0.364906	0.344398	0.345179	0.412831			03072655		Mean	0.241044	0.256406	0.255928	0.275164
		Standard deviation	0.0789698	0.0767772	0.0793889	0.116861	0.102178	0.133682	0.0940552	0.133031					Standard deviation	0.0358187	0.0459806	0.0558501	0.0591641
		Upper limit	0.42587	0.402797	0.453516	0.503704	0.467084	0.47808	0.439234	0.545862					Upper limit	0.276863	0.302387	0.311778	0.334329
		Lower limit	0.26793	0.249243	0.294738	0.269982	0.262728	0.210716	0.251123	0.2798					Lower limit	0.205225	0.210426	0.200078	0.216
		Normal distribution	0.497	0.359	0.719	0.077	0.485	0.467	0.901	0.834					Normal distribution	0.621	0.578	0.104	0.951
		T-test		0.303	0.188	0.126	0.448	0.93	0.939	0.024					T-test		0.441	0.511	0.158
07097000		Mean	0.397979	0.378522	0.423273	0.409331	0.389188	0.350243	0.369672	0.388371			03199700		Mean	0.206481	0.208778	0.258555	0.267983
		Standard deviation	0.042283	0.0415075	0.0634292	0.0710515	0.0687089	0.0751345	0.0918228	0.138112					Standard deviation	0.0384687	0.0379757	0.0904111	0.0718905
		Upper limit	0.440262	0.420029	0.486702	0.480383	0.457897	0.425378	0.461495	0.526483					Upper limit	0.24495	0.246753	0.348966	0.339873
		Lower limit	0.355696	0.337014	0.359844	0.33828	0.320479	0.275109	0.277849	0.250259					Lower limit	0.168013	0.170802	0.168144	0.196092
		Normal distribution	0.526	0.682	0.173	0.211	0.096	0.331	0.95	0.334					Normal distribution	0.95	0.436	0.649	0.943
		T-test		0.122	0.119	0.514	0.604	0.012	0.189	0.752					T-test		0.889	0.094	0.021
													06037500		Mean	0.632433	0.607444	0.571111	0.613587
															Standard deviation	0.054754	0.0808148	0.075281	0.0513117
															Upper limit	0.687187	0.688259	0.646392	0.664899
															Lower limit	0.577679	0.526629	0.49583	0.562275
															Normal distribution	0.555	0.134	0.706	0.988
															T-test		0.385	0.033	0.394
													06228000		Mean	0.32259	0.324494	0.316856	0.294236
															Standard deviation	0.0919548	0.085288	0.105517	0.123323
															Upper limit	0.414545	0.409782	0.422373	0.417559
															Lower limit	0.230635	0.239206	0.21134	0.170913
															Normal distribution	0.642	0.333	0.395	0.088
															T-test		0.946	0.856	0.415
													06296120		Mean	0.453236	0.454052	0.430374	0.456133
															Standard deviation	0.0221482	0.0507901	0.092487	0.128519
															Upper limit	0.475384	0.504843	0.522861	0.584652
															Lower limit	0.431087	0.403262	0.337887	0.327614
															Normal distribution	0.605	0.869	0.832	0.652
															T-test		0.962	0.442	0.943
													06340500		Mean	0.30431	0.360897	0.386672	0.537121
															Standard deviation	0.0906732	0.132622	0.207219	0.0933714
															Upper limit	0.394983	0.493519	0.593891	0.630493
															Lower limit	0.213637	0.228276	0.179453	0.44375
															Normal distribution	0.06	0.415	0.561	0.187
															T-test		0.235	0.226	0
													06892350		Mean	0.421457	0.424988	0.422319	0.457413
															Standard deviation	0.0676166	0.0791739	0.0883909	0.112927
															Upper limit	0.489073	0.504162	0.51071	0.57034
															Lower limit	0.35384	0.345814	0.333928	0.344486
															Normal distribution	0.74	0.915	0.951	0.563
															T-test		0.512	0.957	0.164
													07075250		Mean	0.173304	0.16831	0.244336	0.276076
															Standard deviation	0.0710358	0.0757358	0.135216	0.111831
															Upper limit	0.24434	0.244046	0.379552	0.387906
															Lower limit	0.102268	0.0925742	0.10912	0.164245
															Normal distribution	0.905	0.429	0.118	0.861
															T-test		0.869	0.121	0.013
													07081200		Mean	0.273636	0.233751	0.413266	0.397621
															Standard deviation	0.0591782	0.0584094	0.191341	0.150172
															Upper limit	0.332814	0.29216	0.604607	0.547793
															Lower limit	0.214457	0.175342	0.221926	0.24745
															Normal distribution	0.877	0.551	0.061	0.156
															T-test		0.127	0.039	0.024
													03007800		Mean	0.21645	0.221208	0.231234	0.221588
															Standard deviation	0.0581142	0.0385858	0.0379225	0.0631314
															Upper limit	0.274565	0.259794	0.269157	0.28472
															Lower limit	0.158336	0.182623	0.193312	0.158457
															Normal distribution	0.306	0.245	0.628	0.3
															T-test		0.85	0.556	0.868
													03106000		Mean	0.244039	0.255459	0.272807	0.29242
															Standard deviation	0.0486676	0.0426306	0.0595984	0.0626768
															Upper limit	0.292707	0.29809	0.332405	0.355097
															Lower limit	0.195372	0.212828	0.213209	0.229744
															Normal distribution	0.773	0.424	0.465	0.472
															T-test		0.5	0.159	0.025
													03201980		Mean	0.263601	0.26738	0.259964	0.299173
															Standard deviation	0.0340398	0.0409377	0.0631238	0.0731117
															Upper limit	0.297641	0.308318	0.323088	0.372284
															Lower limit	0.229561	0.226443	0.196841	0.226061
															Normal distribution	0.483	0.983	0.072	0.489
															T-test		0.8	0.856	0.13
													03321500		Mean	0.3169	0.298562	0.352588	0.402347
															Standard deviation	0.0429398	0.050348	0.0833177	0.1076
															Upper limit	0.35984	0.34891	0.435906	0.509947
															Lower limit	0.27396	0.248214	0.269271	0.294747
															Normal distribution	0.902	0.832	0.249	0.071
															T-test		0.392	0.249	0.038
													03374100		Mean	0.337977	0.347002	0.391191	0.403607
															Standard deviation	0.0577402	0.0718111	0.0983931	0.0707142
															Upper limit	0.395717	0.418813	0.489584	0.474321
															Lower limit	0.280237	0.275191	0.292797	0.332893
															Normal distribution	0.989	0.743	0.173	0.382
															T-test		0.717	0.093	0.012
